# Supplementary material for: The Design, Synthesis and Application of Nitrogen Heteropolycyclic Compounds with UV Resistance Properties
Source: MDPI journal article supplement (doi:10.3390/ijms24097882), 2023-04-26
Supplement: s1 [file s1]

## Supporting Information

### The Design, Synthesis and Application of Nitrogen Heteropolycyclic Compounds with Anti-UV Properties

Biao Yang Error! Bookmark not defined., Xinbo Yang<sup>1,2</sup>, Yuchuan Li<sup>1\*</sup> and Siping Pang<sup>1,\*</sup>

<sup>1</sup>*School of Materials Science and Engineering, Beijing Institute of technology, Beijing, 100081, China*

<sup>2</sup>*School of Mechatronical Engineering, Beijing Institute of Technology, Beijing, 100081, China*

\*Correspondence to: Yuchuan Li, and Siping Pang (E-mail: liyuchuan@bit.edu.cn; pangsp@bit.edu.cn)

## TABLE OF CONTENTS

|                                               |    |
|-----------------------------------------------|----|
| 1. NMR spectra.....                           | 3  |
| 2. Mass spectra .....                         | 7  |
| 3. Ultraviolet absorption spectrum .....      | 9  |
| 4. Single crystal X diffraction pattern ..... | 10 |
| 5. Degradation of the film during aging.....  | 15 |

## 1. NMR spectra

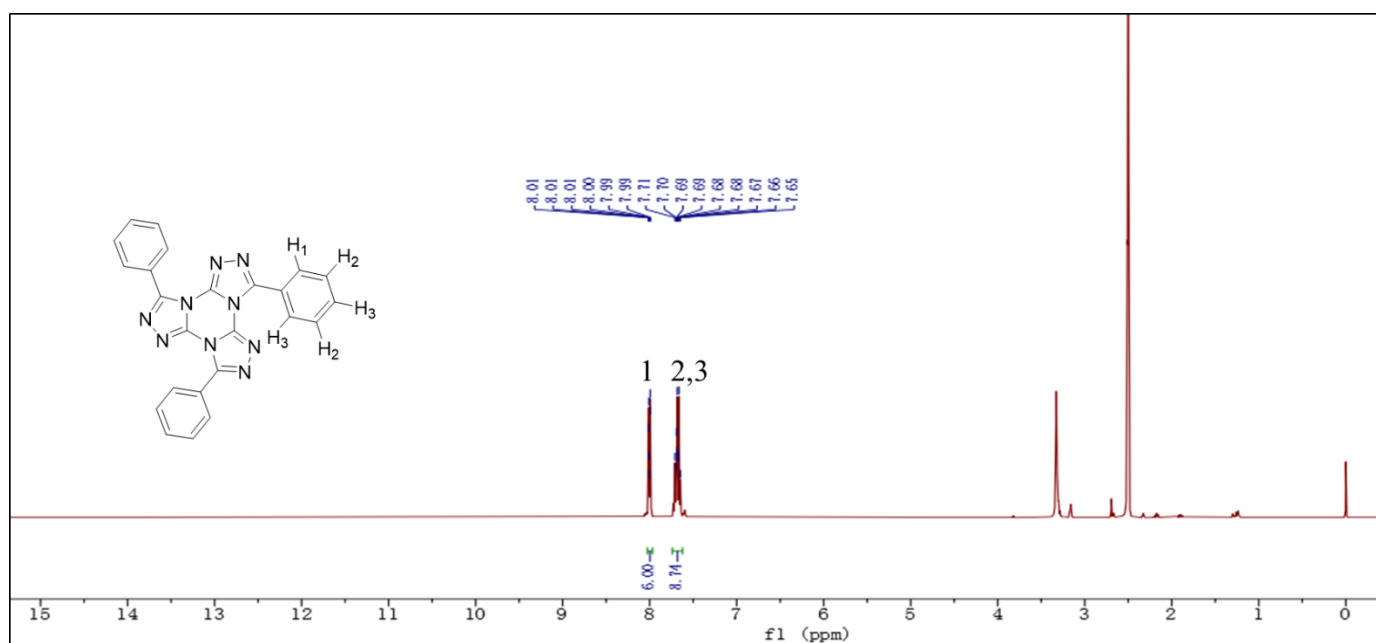

**Figure S1.**  $^1\text{H}$  NMR spectrum (400 MHz) in  $\text{DMSO-}d_6$  for compound TTTB.

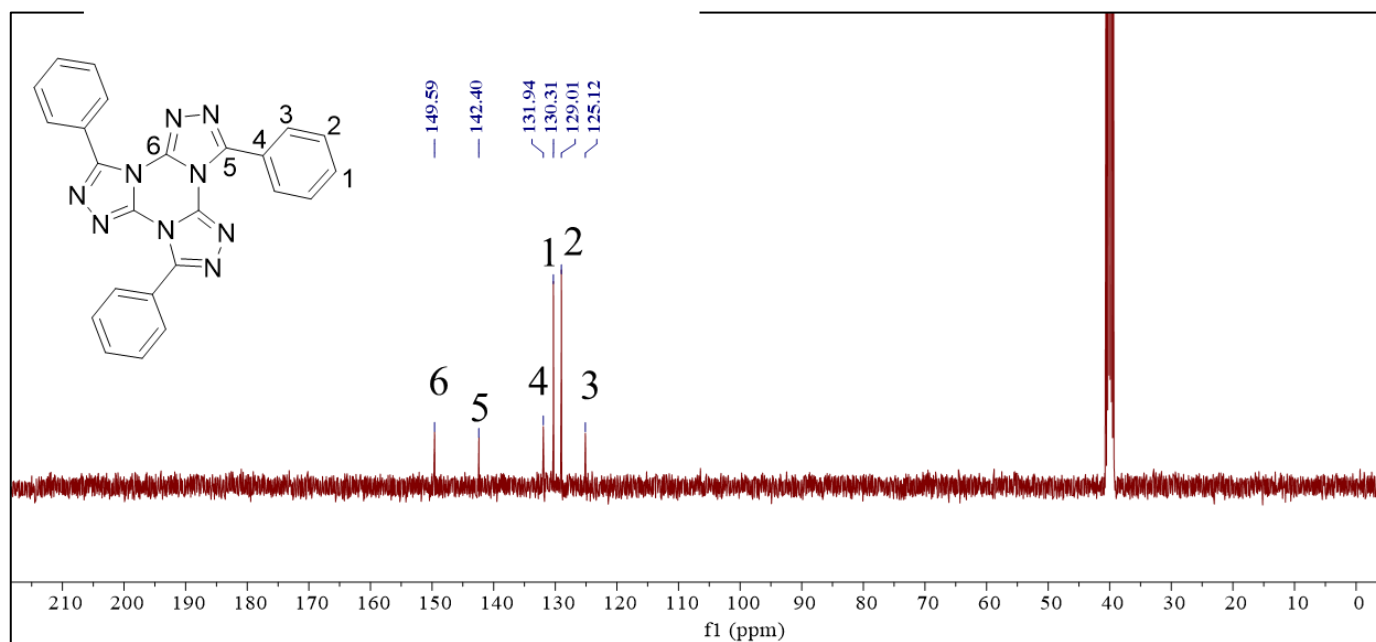

**Figure S2.**  $^{13}\text{C}$  NMR spectrum (100 MHz) in  $\text{DMSO-}d_6$  for compound TTTB.

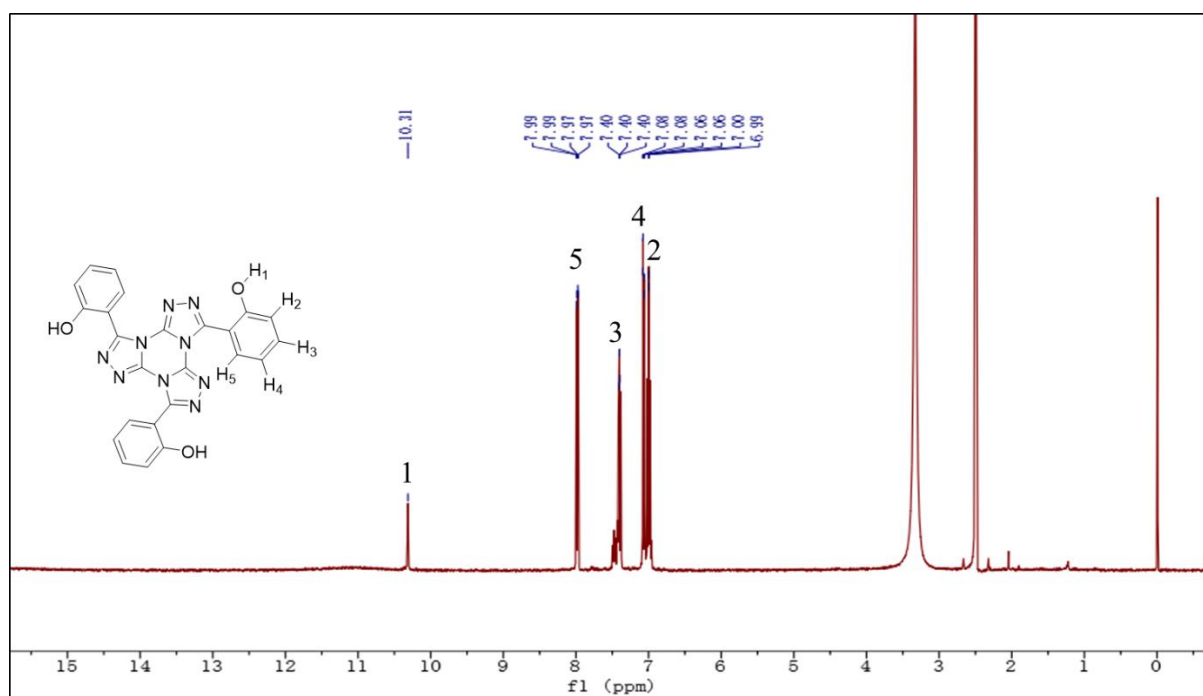

**Figure S3.** <sup>1</sup>H NMR spectrum (400 MHz) in CDCl<sub>3</sub> for compound TTTL.

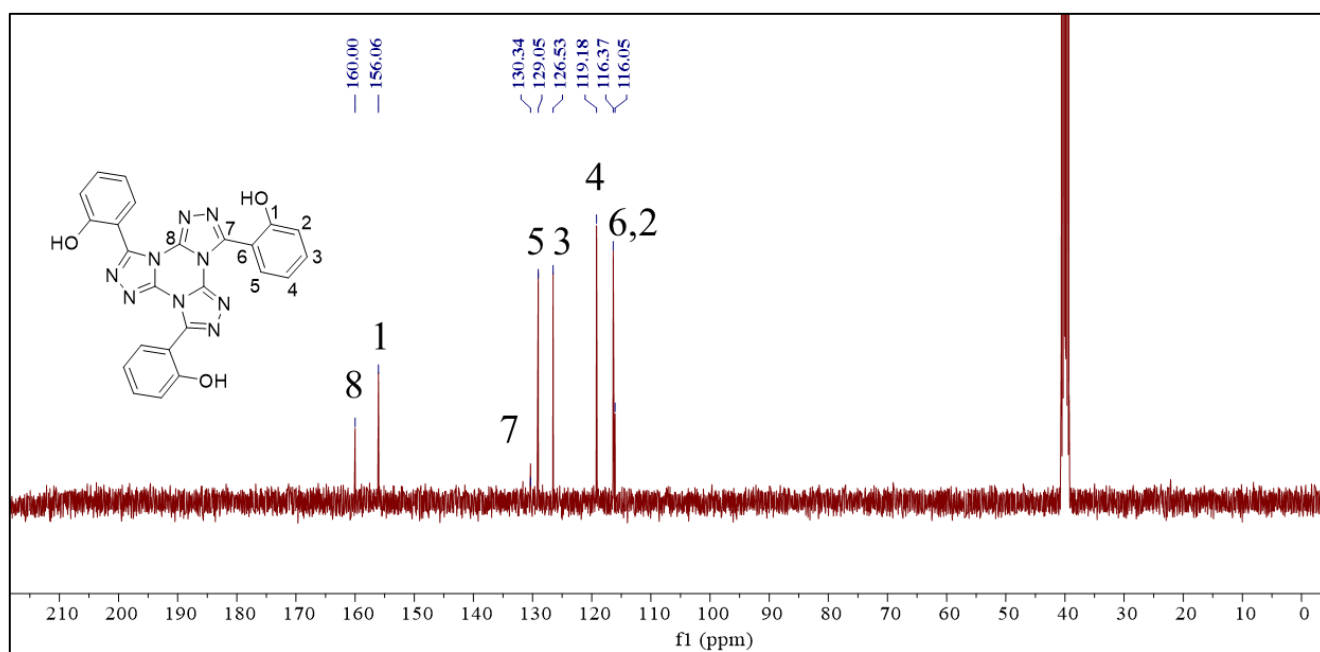

**Figure S4.** <sup>13</sup>C NMR spectrum (100 MHz) in CDCl<sub>3</sub> for compound TTTL.

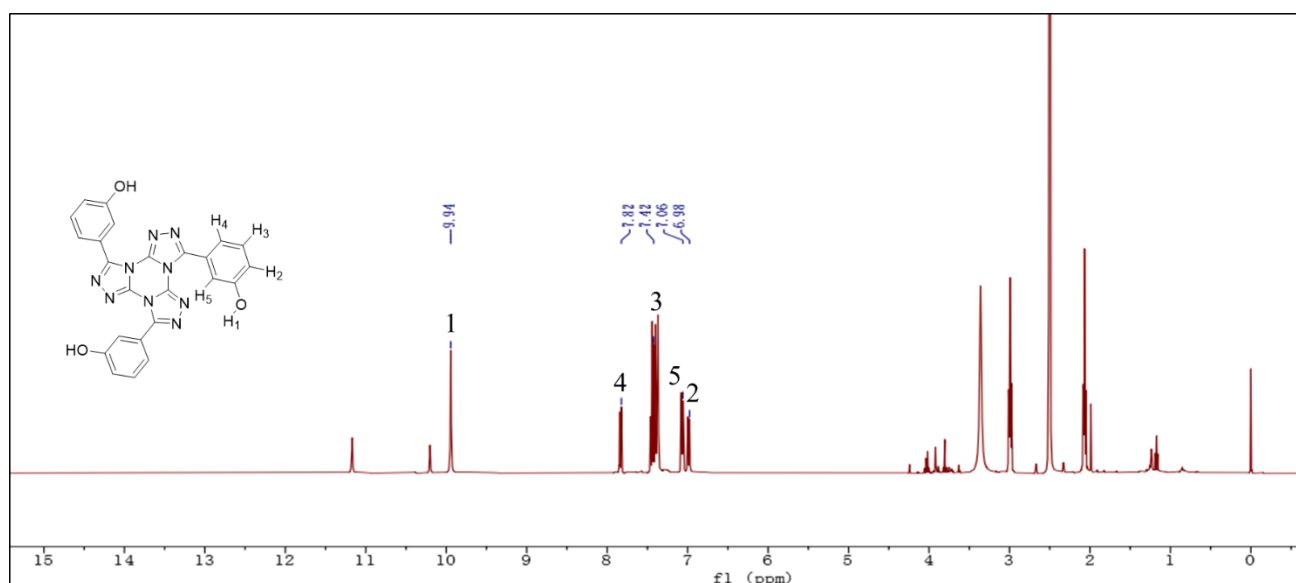

**Figure S5.** <sup>1</sup>H NMR spectrum (400 MHz) in CDCl<sub>3</sub> for compound TTTJ.

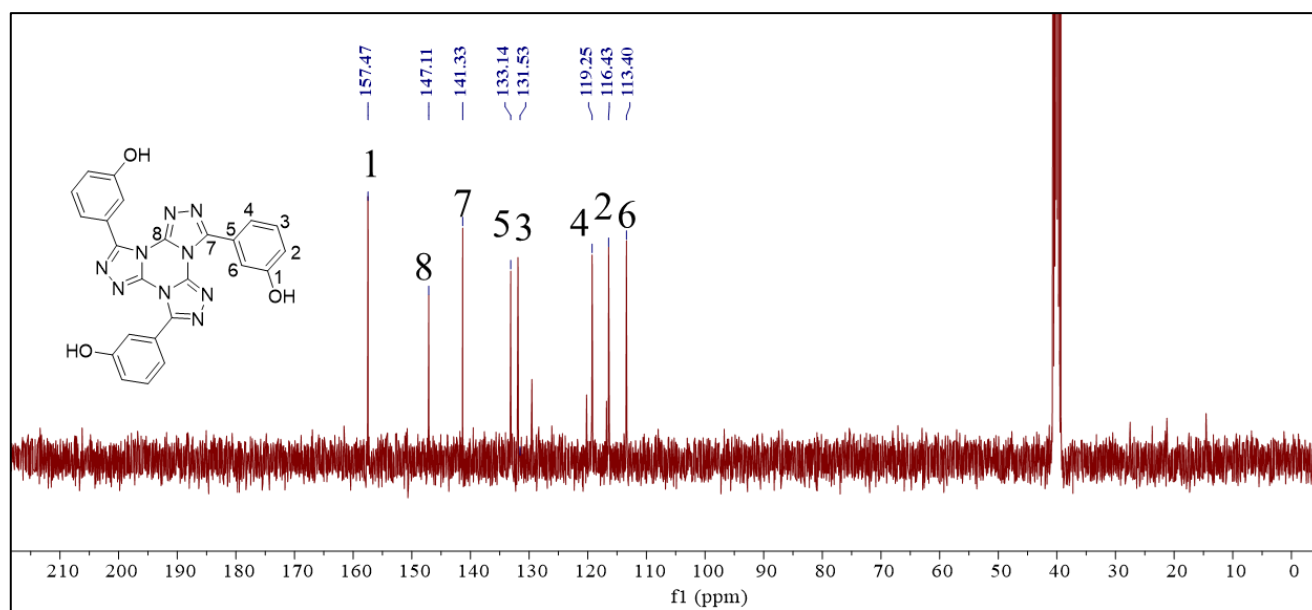

**Figure S6.** <sup>13</sup>C NMR spectrum (100 MHz) in CDCl<sub>3</sub> for compound TTTJ.

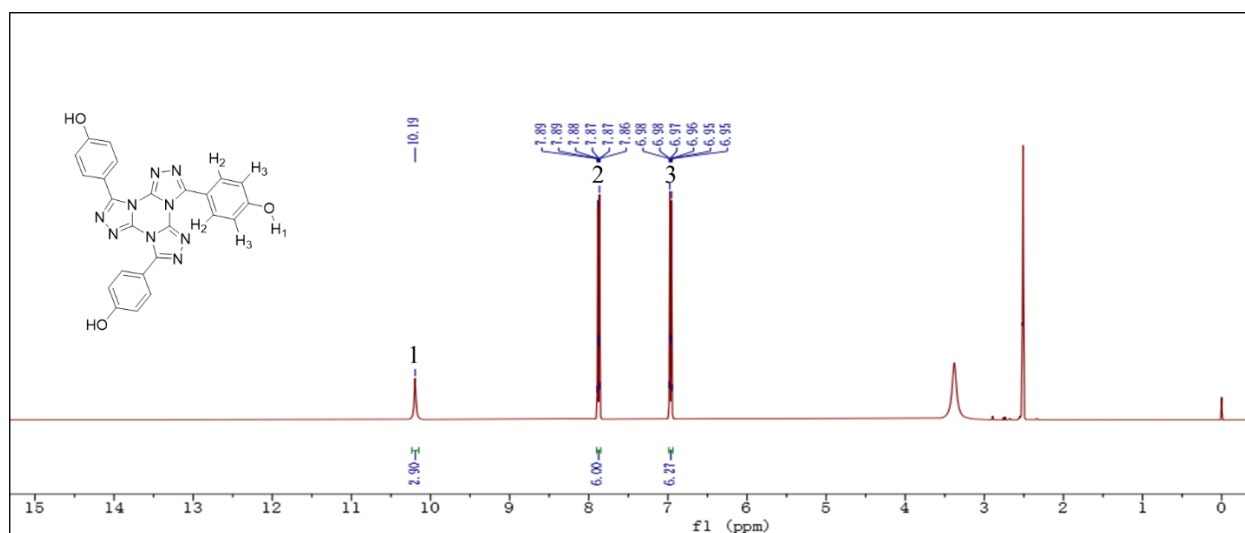

**Figure S7.** <sup>1</sup>H NMR spectrum (400 MHz) in CDCl<sub>3</sub> for compound TTTD.

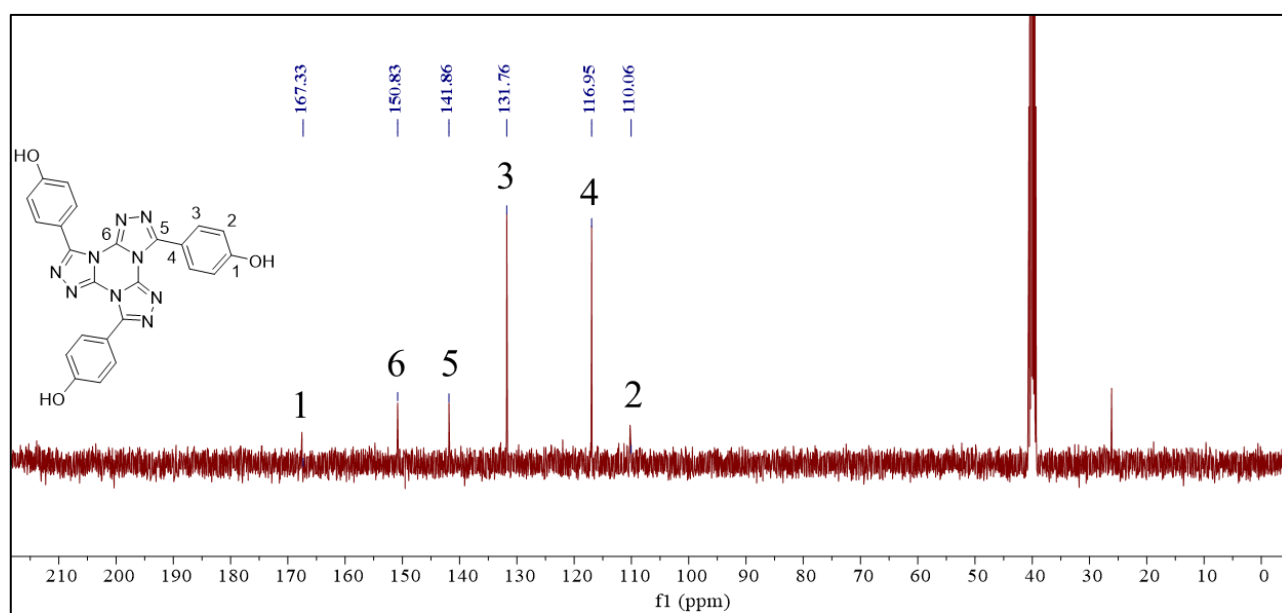

**Figure S8.** <sup>13</sup>C NMR spectrum (100 MHz) in CDCl<sub>3</sub> for compound TTTD.

## 2. Mass spectra

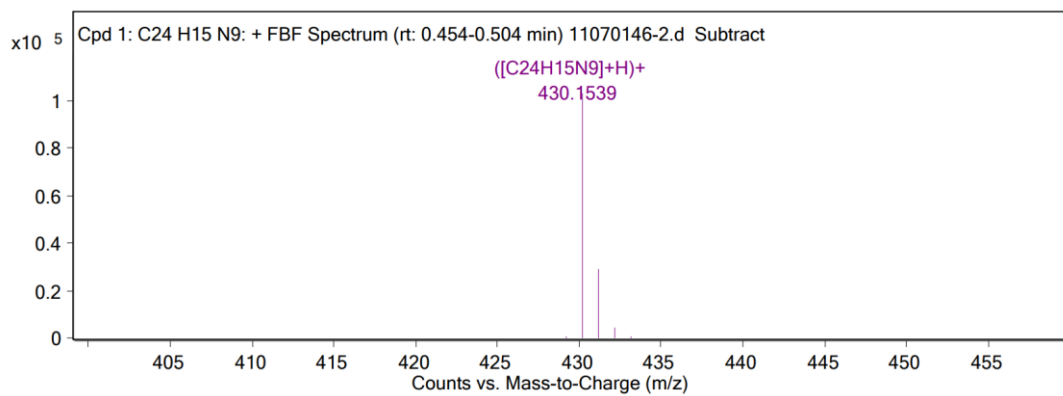

**Figure S9.** Mass spectrum of compound TTTB.

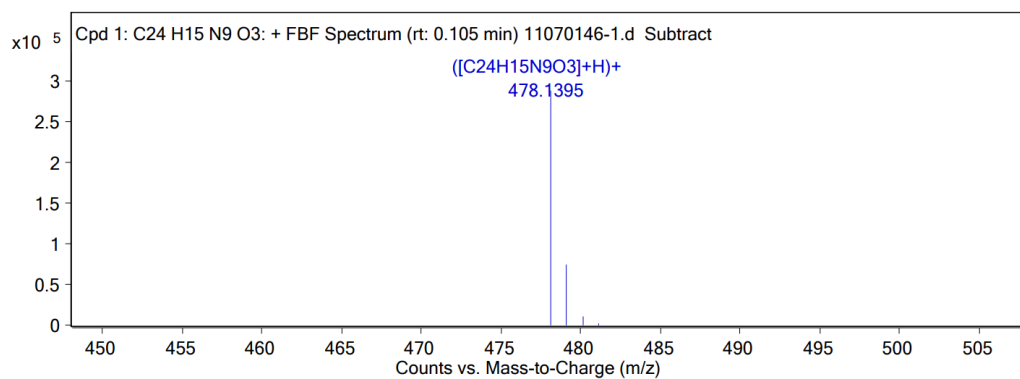

**Figure S10.** Mass spectrum of compound TTTL.

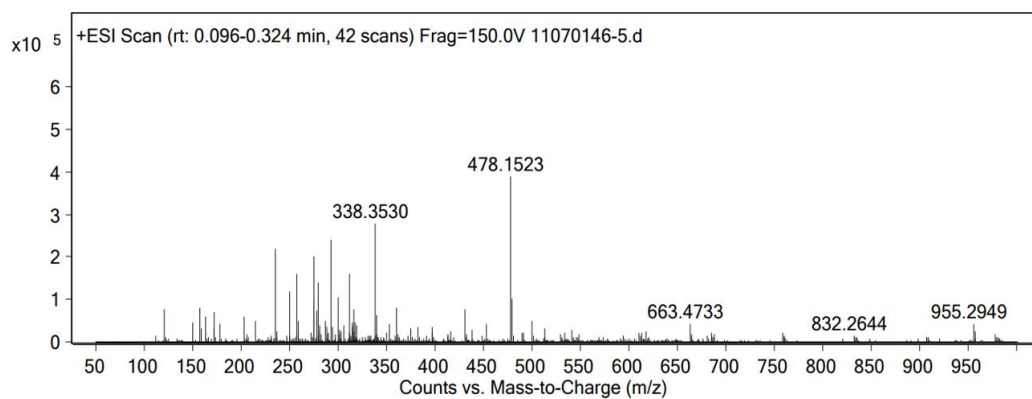

**Figure S11.** Mass spectrum of compound TTTJ.

7144458 #3-304 RT: 0.02-0.85 AV: 123 NL: 4.44E7  
T: FTMS - p ESI Full ms [100.0000-1000.0000]

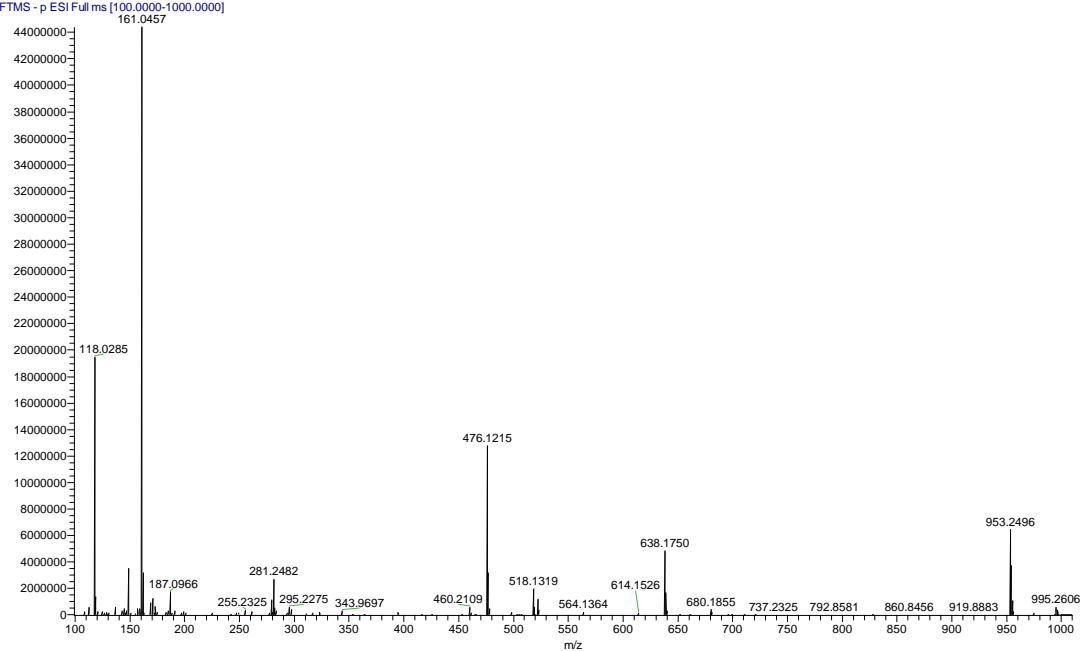

**Figure S12.** Mass spectrum of compound TTTD.



### 3. Ultraviolet absorption spectrum

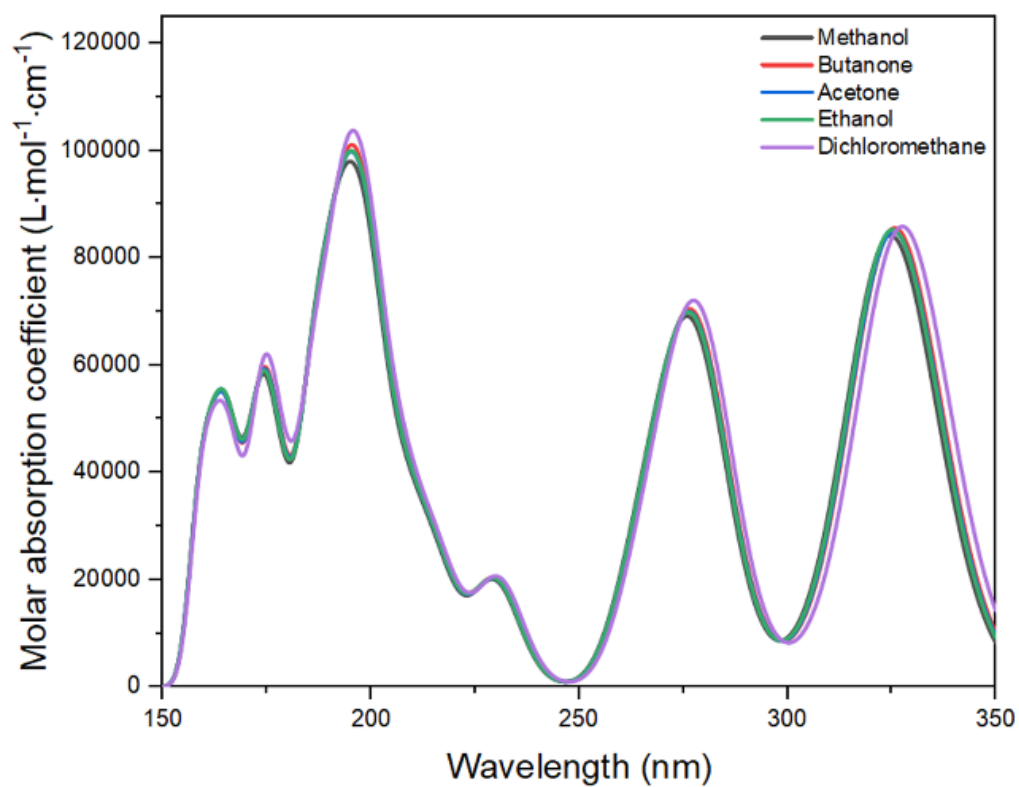

**Figure S13.** UV-visible absorption spectra of TTTL in different organic solvents were simulated.

#### 4. Single crystal X diffraction pattern

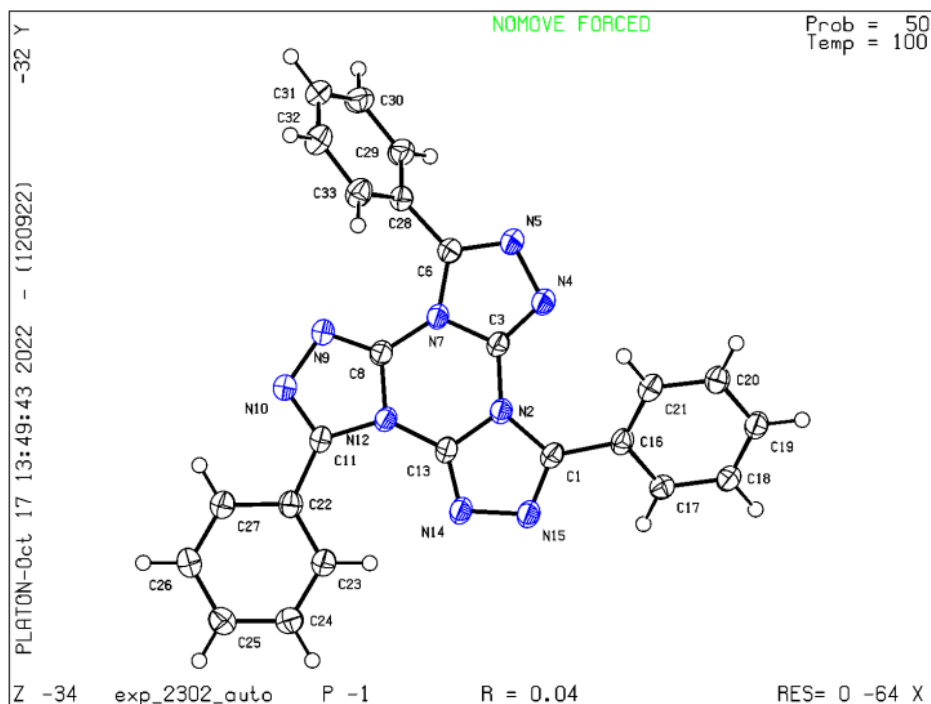

Figure S14. Infrared spectrum of compound TTTB.

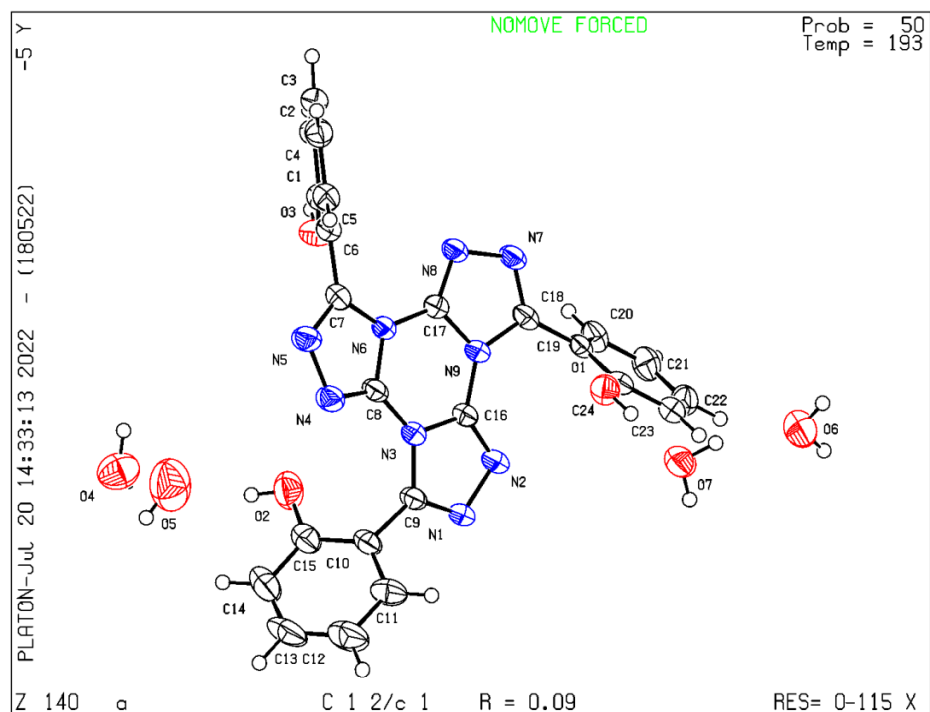

Figure S15. Infrared spectrum of compound TTTL.

**Table S1.** Bond Lengths for TTTB.

| Chemical bond | Length / Å | Chemical bond | Length / Å |
|---------------|------------|---------------|------------|
| N2-C3         | 1.3899     | C16-C1        | 1.4736     |
| N2-C13        | 1.3857     | C11-C22       | 1.4767     |
| N2-C1         | 1.3955     | C6-C28        | 1.4704     |
| N12-C11       | 1.413      | C20-C21       | 1.3882     |
| N12-C8        | 1.3775     | C20-C19       | 1.385      |
| N12-C13       | 1.4022     | C22-C23       | 1.393      |
| N7-C3         | 1.3706     | C22-C27       | 1.407      |
| N7-C6         | 1.3905     | C17-C18       | 1.3873     |
| N7-C8         | 1.3895     | C23-C24       | 1.391      |
| N15-N14       | 1.3977     | C28-C33       | 1.3936     |
| N15-C1        | 1.307      | C28-C29       | 1.389      |
| N14-C13       | 1.2925     | C26-C27       | 1.382      |
| N5-N4         | 1.4007     | C26-C25       | 1.388      |
| N5-C6         | 1.3081     | C19-C18       | 1.382      |
| N4-C3         | 1.2925     | C25-C24       | 1.387      |
| N9-N10        | 1.3885     | C33-C32       | 1.383      |
| N9-C8         | 1.2893     | C29-C30       | 1.384      |
| N10-C11       | 1.3075     | C32-C31       | 1.384      |
| C16-C17       | 1.3981     | C30-C31       | 1.388      |
| C16-C21       | 1.393      |               |            |

**Table S2.** Bond Lengths for TTTL.

| Chemical bond | Length / Å | Chemical bond | Length / Å |
|---------------|------------|---------------|------------|
| O1-C24        | 1.351      | C7-C6         | 1.46       |
| O3-C1         | 1.363      | C6-C1         | 1.393      |
| N6-C17        | 1.394      | C6-C5         | 1.386      |
| N6-C7         | 1.392      | C19-C18       | 1.472      |
| N6-C8         | 1.375      | C19-C24       | 1.396      |
| N9-C17        | 1.37       | C19-C20       | 1.392      |
| N9-C16        | 1.389      | C9-C10        | 1.468      |
| N9-C18        | 1.385      | C1-C2         | 1.392      |
| N3-C16        | 1.369      | C24-C23       | 1.393      |
| N3-C9         | 1.386      | C3-C2         | 1.376      |
| N3-C8         | 1.387      | C3-C4         | 1.393      |
| N7-N8         | 1.408      | C10-C15       | 1.376      |
| N7-C18        | 1.309      | C10-C11       | 1.4        |
| O2-C15        | 1.348      | C23-C22       | 1.388      |
| N1-N2         | 1.396      | C20-C21       | 1.379      |
| N1-C9         | 1.307      | C5-C4         | 1.382      |
| N8-C17        | 1.287      | C21-C22       | 1.37       |
| N2-C16        | 1.291      | C15-C14       | 1.399      |
| N4-N5         | 1.401      | C11-C12       | 1.369      |
| N4-C8         | 1.292      | C14-C13       | 1.364      |
| N5-C7         | 1.311      | C13-C12       | 1.371      |

**Table S3.** Crystal data and structure refinement for TTTB.

| Empirical formula                       | C <sub>24</sub> H <sub>15</sub> N <sub>9</sub> |
|-----------------------------------------|------------------------------------------------|
| Formula weight                          | 429.45                                         |
| Temperature/K                           | 100.01                                         |
| Crystal system                          | triclinic                                      |
| Space group                             | <i>P</i> -1                                    |
| a /Å                                    | 6.08034 (15)                                   |
| b /Å                                    | 12.5701 (4)                                    |
| c /Å                                    | 13.7523 (4)                                    |
| $\alpha$ /°                             | 110.383 (3)                                    |
| $\beta$ /°                              | 92.436 (2)                                     |
| $\gamma$ /°                             | 102.329 (2)                                    |
| V /Å <sup>3</sup>                       | 954.69 (5)                                     |
| Z                                       | 2                                              |
| $\rho$ / (g·cm <sup>-3</sup> )          | 1.494                                          |
| $\mu$ /mm <sup>-1</sup>                 | 0.780                                          |
| Crystal size / mm <sup>3</sup>          | 0.2 × 0.15 × 0.08                              |
| 2 $\theta$ range for data collection /° | 6.914 to 153.578                               |

**Table S4.** Crystal data and structure refinement for TTTL.

| Empirical formula                        | C <sub>24</sub> H <sub>23</sub> N <sub>9</sub> O <sub>7</sub> |
|------------------------------------------|---------------------------------------------------------------|
| Formula weight                           | 549.51                                                        |
| Temperature/K                            | 193.00                                                        |
| Crystal system                           | monoclinic                                                    |
| Space group                              | C2/c                                                          |
| a / Å                                    | 40.322 (4)                                                    |
| b / Å                                    | 7.0682 (7)                                                    |
| c / Å                                    | 17.4724 (18)                                                  |
| $\alpha$ / °                             | 90                                                            |
| $\beta$ / °                              | 100.180 (3)                                                   |
| $\gamma$ / °                             | 90                                                            |
| V / Å <sup>3</sup>                       | 4901.3 (9)                                                    |
| Z                                        | 8                                                             |
| $\rho$ /(g·cm <sup>-3</sup> )            | 1.489                                                         |
| $\mu$ / mm <sup>-1</sup>                 | 0.113                                                         |
| Crystal size / mm <sup>3</sup>           | 0.13 × 0.12 × 0.1                                             |
| 2 $\theta$ range for data collection / ° | 4.738 to 55.074                                               |

## 5. Degradation of the film during aging

**Table S5.** Classification of degradation grade of films in UV aging tester.

| Empirical formula | 0h | 48h | 96h | 144h |
|-------------------|----|-----|-----|------|
| PVC               | 0  | 0   | 1   | 2    |
| PVC/TTTL          | 0  | 0   | 0   | 0    |
| PVC/TTTJ          | 0  | 0   | 0   | 0    |
| PVC/TTTD          | 0  | 0   | 0   | 1    |
| PVC/TTTB          | 0  | 0   | 0   | 1    |
| PVC/UV-0          | 0  | 0   | 0   | 1    |
| PVC/UV-327        | 0  | 0   | 0   | 0    |

Notes: Grade 0: Grade 1: Cracks or holes < 2 cm; Grade 2: Cracks or holes > 2 cm; Grade 3: Large area fracture; Grade 4: Break into pieces
